# Supplementary material for: Arabidopsis SUMO E3 Ligase SIZ1 Interacts with HDA6 and Negatively Regulates HDA6 Function during Flowering
Source: MDPI journal article supplement (doi:10.3390/cells10113001), 2021-11-03
Supplement: s1 [file s1]

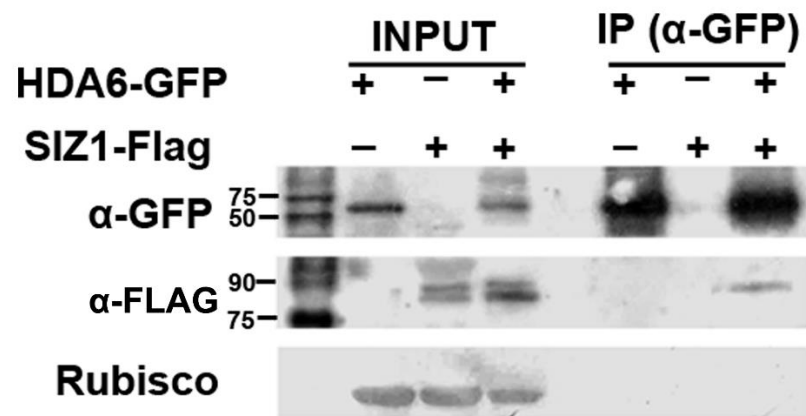

**Figure S1.** Co-IP analysis of the interaction of HDA6 with SIZ1 using transgenic plants. Total proteins were extracted from 15-day-old co-expressing *pro-HDA6:HDA6-GFP* and *pro35S:SIZ1-FLAG* seedlings grown under LD conditions. GFP-Trap-A beads were used for immunoprecipitation ( $\alpha$ -GFP). The precipitated protein and the input samples were detected with anti-GFP and anti-FLAG antibodies. Input HDA6-GFP and SIZ1-FLAG proteins were detected with anti-GFP and anti-FLAG antibodies, respectively. The molecular weight (kDa) is indicated in the right panel. IP-immunoprecipitation, Rubisco indicates loading control.

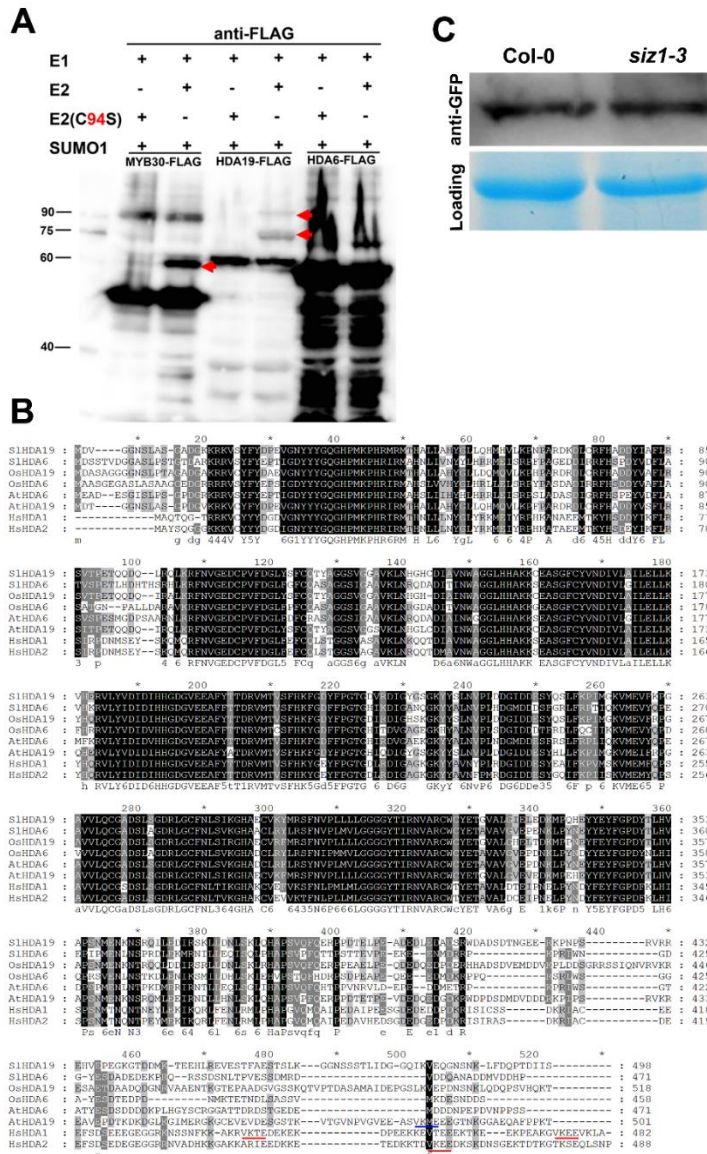

**Figure S2.** SUMOylation analysis of HDA6. (A) The SUMO conjugation of HDA6 was detected in a reconstituted SUMOylation system in *E. coli*. In the presence of E1 and SUMO1 with the E2 or E2 inactive mutant (C94S), the unconjugated and SUMO-conjugated HDA6-FLAGs were detected by an anti-FLAG antibody. MYB30 and HDA19 were used as positive control. The red arrows indicated the SUMO-conjugated of MYB30 and HDA19, respectively. (B) The alignment of HDA6 and its homologues in plants and human. *At*, *Arabidopsis thaliana*; *Os*, *Oryza sativa*; *Sl*, *Solanum lycopersicum*; *Ho*, *Homo sapiens*. The red line indicates the SUMOylation sites of HsHDAC1 and HsHDAC2, while blue line indicates the predictive SUMOylation site of AtHDA19. (C) Western blotting analysis of HDA6 protein in *proHDA6:HDA6-GFP siz1-3* transgenic plants. Total proteins were extracted from 15-day-old seedlings in an extraction buffer (50 mM Tris-HCl, pH 7.4, 150 mM NaCl, 2 mM MgCl<sub>2</sub>, 1 mM DTT, 20% glycerol, and 1% NP-40) containing the protease inhibitor cocktail, subsequently, separated by 10% SDS-PAGE, and detected by western blotting using an anti-GFP antibody. The coomassie blue staining of PAGE gel is shown in the lower panel as a protein loading control.

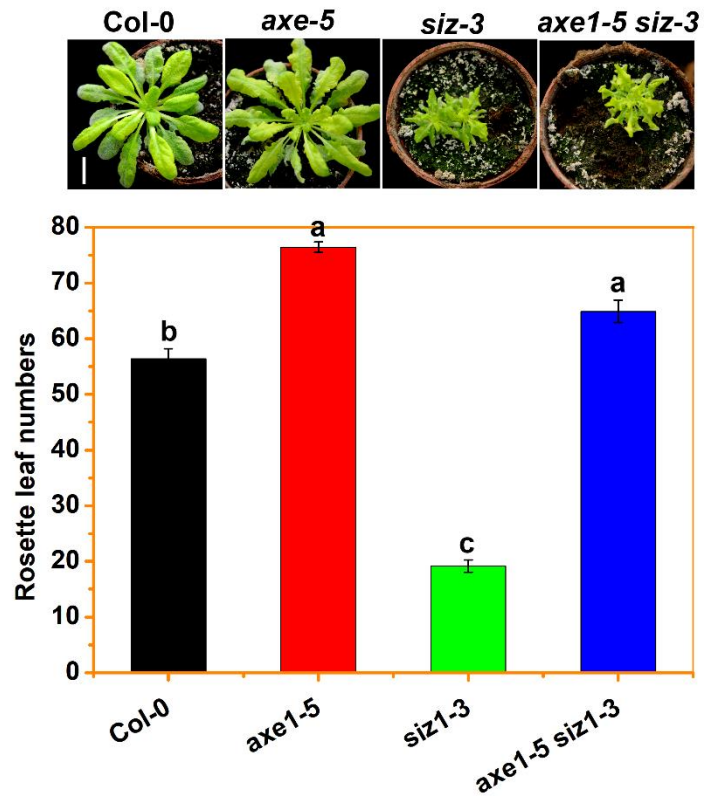

**Figure S3.** Flowering phenotypes of Col-0, *axe1-5*, *siz1-3*, *axe1-5 siz1-3* plants grown under SD conditions. For direct comparison, the pictures of Col-0, *axe1-5*, *siz1-3*, *axe1-5 siz1-3* grown under SD conditions for 6 weeks were taken at the same time. Bar=1cm.

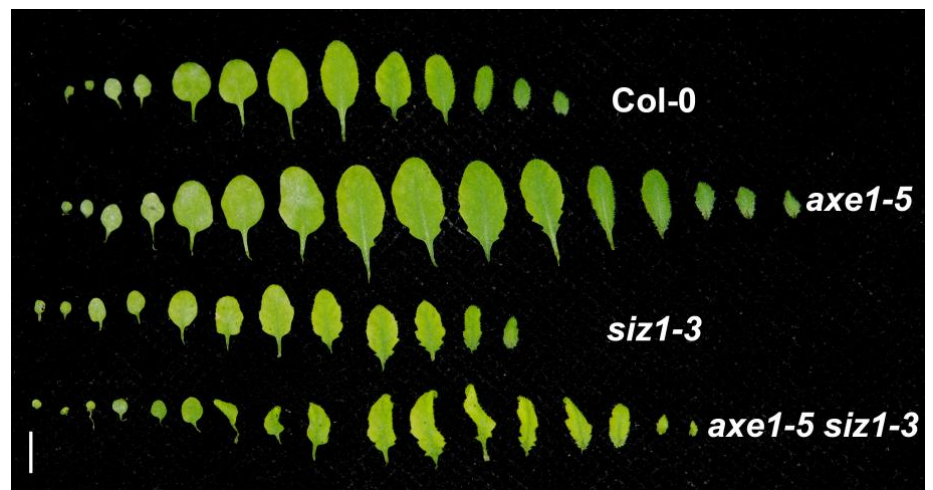

**Figure S4.** Leaves phenotypes of 21-day-old WT, *axe1-5*, *siz1-3* and *axe1-5 siz1-3* plants under LD. Bars =1 cm.

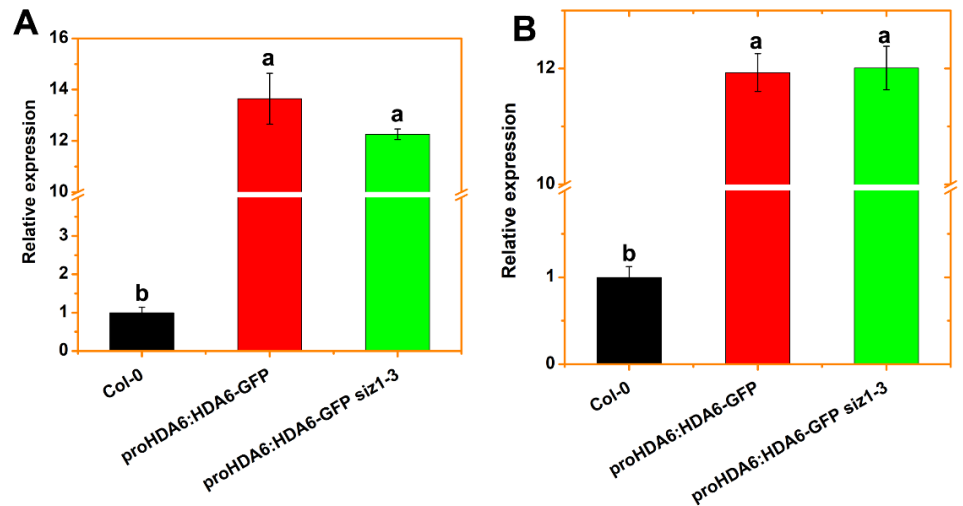

**Figure S5.** The mRNA levels of *HDA6* in 15-day-old Col-0, *proHDA6:HDA6-GFP* and *proHDA6:HDA6-GFP siz1-3* plants using *ACTIN2* (A) and *UBQ10* (B) as an internal control.

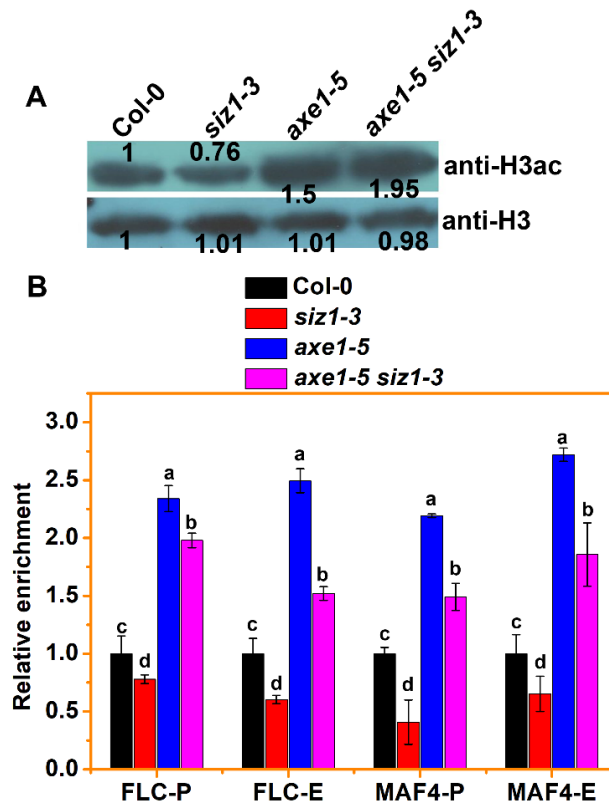

**Figure S6.** The H3ac levels changes in 15-day-old WT, *axe1-5*, *siz1-3* and *axe1-5 siz1-3* plants. (A) Immunoblot analyses of total histone extracted from 15-day-old WT, *axe1-5*, *siz1-3* and *axe1-5 siz1-3* plants using indicated antibodies. The histone H3 antibody was used as a loading control. The numbers shown on the gels represent the quantitative results (in arbitrary units). (B) ChIP analysis of H3ac levels on the *FLC* and *MAF4* loci in 15-day-old WT, *axe1-5*, *siz1-3* and *axe1-5 siz1-3* plants. The amounts of DNA after ChIP were quantified by qPCR and normalized to *ACTIN2*. Error bars correspond to standard deviations from three biological replicates. Different letters above bars indicate significant differences between the mutant and WT ( $p < 0.05$ , post hoc test).

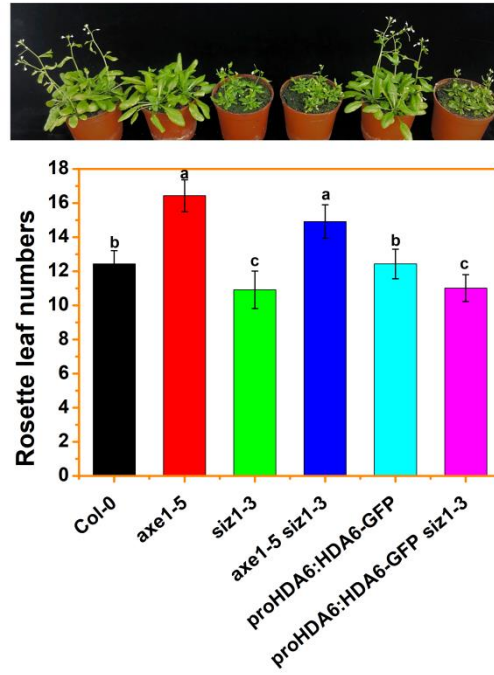

**Figure S7.** Flowering phenotypes of Col-0, *axe1-5*, *siz1-3*, *axe1-5 siz1-3*, *proHDA6:HDA6-GFP* and *proHDA6:HDA6-GFP siz1-3* plants under LD. For direct comparison, pictures of various genetic backgrounds were taken at the same time shortly after bolting of *axe1-5*. Bar=1cm.

**Table S1.** Primers used in this study.

| Primer for qPCR              | Forward                                                           | Reverse                                                       |
|------------------------------|-------------------------------------------------------------------|---------------------------------------------------------------|
| <i>FLC</i>                   | GCCAAGAAGACCGAACTCAT                                              | TTTGTCCAGCAGGTGACATC                                          |
| <i>MAF1</i>                  | TGGTAGTGAGGAAGTGGTTGG                                             | TCGTATGGCCTCTTGTGTTC                                          |
| <i>MAF2</i>                  | GAGACTGCTCTGTCCGTAACATA                                           | GCCAAAGTCTGGTTCTCTTCTC                                        |
| <i>MAF3</i>                  | GGGAGAAGTTGCTGATAGAAGAG                                           | AAGAGTCTCCGGTACTTTGTTG                                        |
| <i>MAF4</i>                  | ATTAGGTCAGAAGAATTAGTCG-<br>GAGAAAAC                               | CTTGGATGACTTTTCCGTAGCAGGGGGAAG                                |
| <i>MAF5</i>                  | GGGGATTAGATGTGTCTCGGAAGAG-<br>TGAAG<br>AG-                        | GATCCTGTCTTCCAAGGTAACACAAAGG                                  |
| <i>FT</i>                    | GCCTTCTCAGGTTCAAAACAAGC                                           | TGCCAAAGGTTGTTCCAGTTGTAGCA                                    |
| <i>SOC1</i>                  | ATAGGAACATGCTCAATCGAG-<br>GAGCTG                                  | TTTCTTGAAGAACAAGGTAACCCAATG                                   |
| <i>UBQ10</i>                 | GATCTTTGCCGGAACAATT-<br>GGAGGATGG                                 | CGACTTGTCATTAGAAAGAAAGAGATAACA                                |
| <i>ACTIN2</i>                | CTAAGCTCTCAAGATCAAAGGC                                            | AACATTGCAAAGAGTTTCAAGG                                        |
| <b>Primer for constructs</b> |                                                                   |                                                               |
| HDA6-AD                      | ATGGAGGCCAGTGAATTC<br><i>ATGGAGGCAG ACGAAAGCGGCA</i>              | TCATCTGCAGCTCGAGC<br><i>AGACGATGGAGGATTCACGTCTG</i>           |
| SIZ1-AD                      | ATGGAGGCCAGTGAATTC<br><i>ATGGATTTGGAAGCTAATTG</i>                 | TCATCTGCAGCTCGAGCGG<br><i>CTCAGAATCCGAGTCAATGGA</i>           |
| HDA6-BD                      | CCATGGAGGCCGAATTC<br><i>ATGGAGGCAG ACGAAAGCGGCA</i>               | GCCGCTGCAGGTCGACG<br><i>AGACGATGGAGGATTCACGTCTG</i>           |
| SIZ1-BD                      | CCATGGAGGCCGAATTC<br><i>ATGGATTTGGAAGCTAATTG</i>                  | GCCGCTGCAGGTCGACG<br><i>CTCAGAATCCGAGTCAATGGA</i>             |
| SIZ1-pHB-<br>FLAG            | TCTCTCAAGCTTGATCC<br><i>ATGGATTTGGAAGCTAATTG</i><br>GGATCCATGGAT- | ACCGTCACTAGTGGATCC<br><i>CTCAGAATCCGAGTCAATGGA</i>            |
| HDA6-<br>pET28-FLAG          | TACAAGGATGACGACGATAAG<br><i>ATGGAGGCAGACGAAAGCGG-<br/>CATCT</i>   | <i>ctcgagt</i> TTAAGACGATGGAGGATTCA<br>CGTCTGGCTCTGGGTTATCGTC |
| pEAQ-HDA6-<br>GFP            | cgCGTCCCGGGTCGAC<br><i>ATGGAGGCAGACGAAAGCG</i>                    | TGCTAGTCATTCTAG<br><i>AGACGATGGAGGATTCACGT</i>                |
| pEAQ-GFP-<br>HDA6            | GGATGAACATATACAAA<br><i>ATGGAGGCAGACGAAAGCG</i>                   | GAGTAAAGGCCTCGAG<br><i>ttaAGACGATGGAGGATTCACGT</i>            |
| HDA6-<br>pCAMBIA-<br>1302    | GGACTCTTGACCATGGTA<br><i>ATGGAGGCAG ACGAAAGCGGCA</i>              | GTCAGATCTACCATGGT<br><i>AGACGATGGAGGATTCACGTCTG</i>           |
| <b>Primer for ChIP qPCR</b>  |                                                                   |                                                               |
| <i>ACTIN2</i>                | CGTTTCGCTTTCTTAGTGTTAGCT                                          | AGCGAACGGATCTAGAGACTCACCTTG                                   |
| <i>TA3</i>                   | GATTCTTACTGTAAAGAACATGG-<br>CATTGAGAGA                            | TCCAAATTTCTGAGGTGCTTGTAACC                                    |
| <i>FLC-P</i>                 | TGTAGGCACGACTTTGGTAACACC                                          | GCAGAAAGAACCTCCACTCTACATC                                     |
| <i>FLC-E</i>                 | CGACTTGAACCCAAACCTGAG-<br>GATCAAAT                                | AGAAGATAAAAAGGGGAACAAATGAAAAC                                 |
| <i>MAF4-P</i>                | GGTCGGTTTAGAGTCCAATC                                              | TGGTGTAAGATAGTTCCACG                                          |
| <i>MAF4-E</i>                | CGCACC GTTTAGACTCTTTG                                             | GTTGACGAGCTTCTCCATG                                           |
